# Supplementary material for: Sex and region-specific disruption of autophagy and mitophagy in Alzheimer’s disease: linking cellular dysfunction to cognitive decline
Source: Springer Nature journal article supplement (doi:10.1038/s41420-025-02490-0), 2025-04-26

# BCL2L13 FEAMLE TOTAL PROTEIN

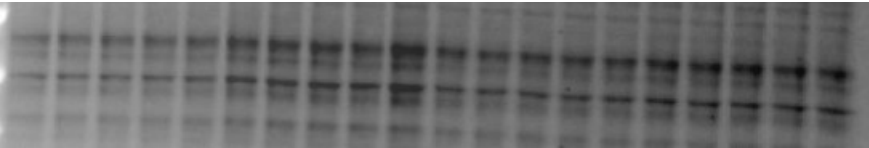

BCL2L13 FEMALE

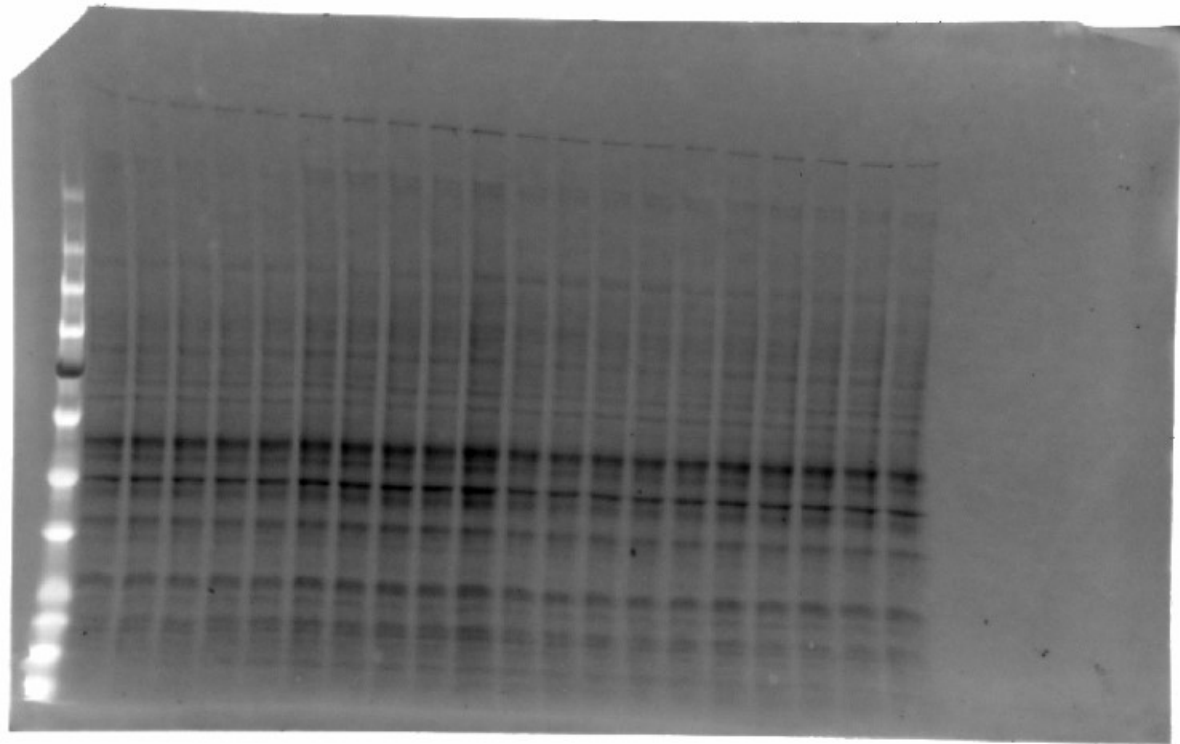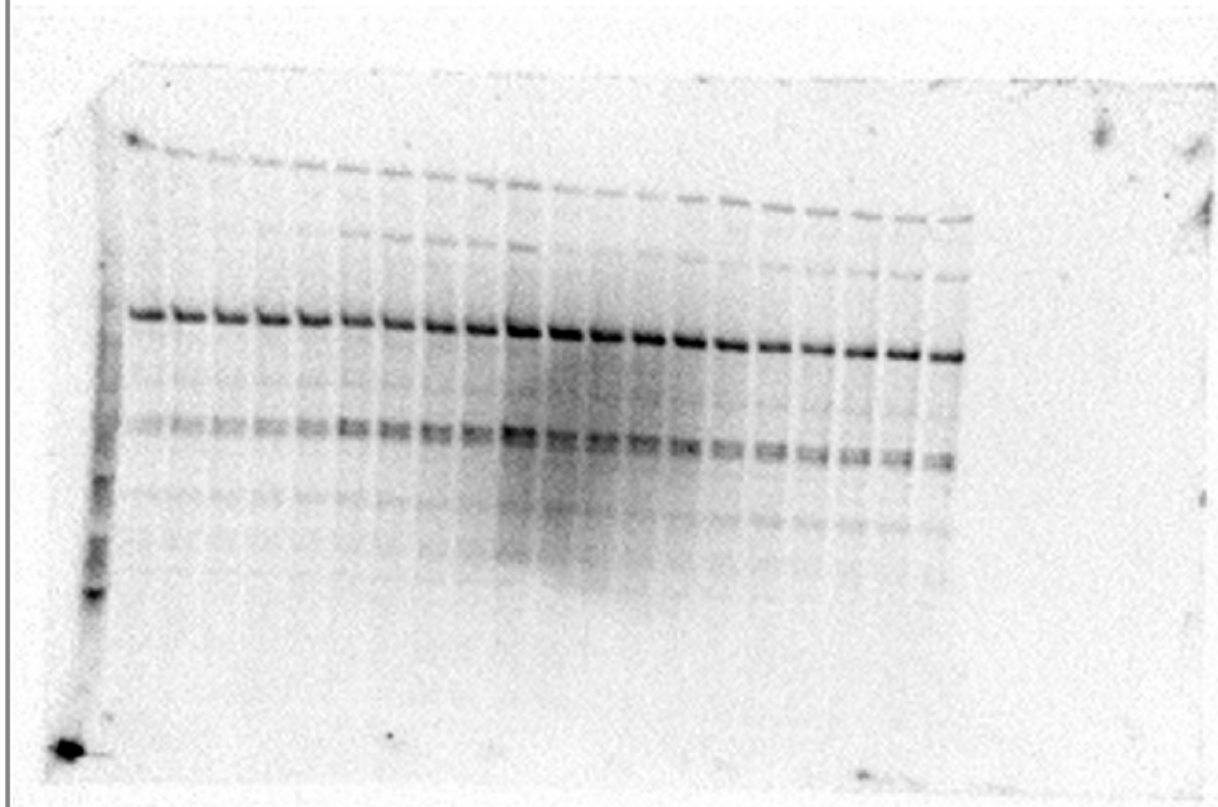

BCL2L13 MALE -

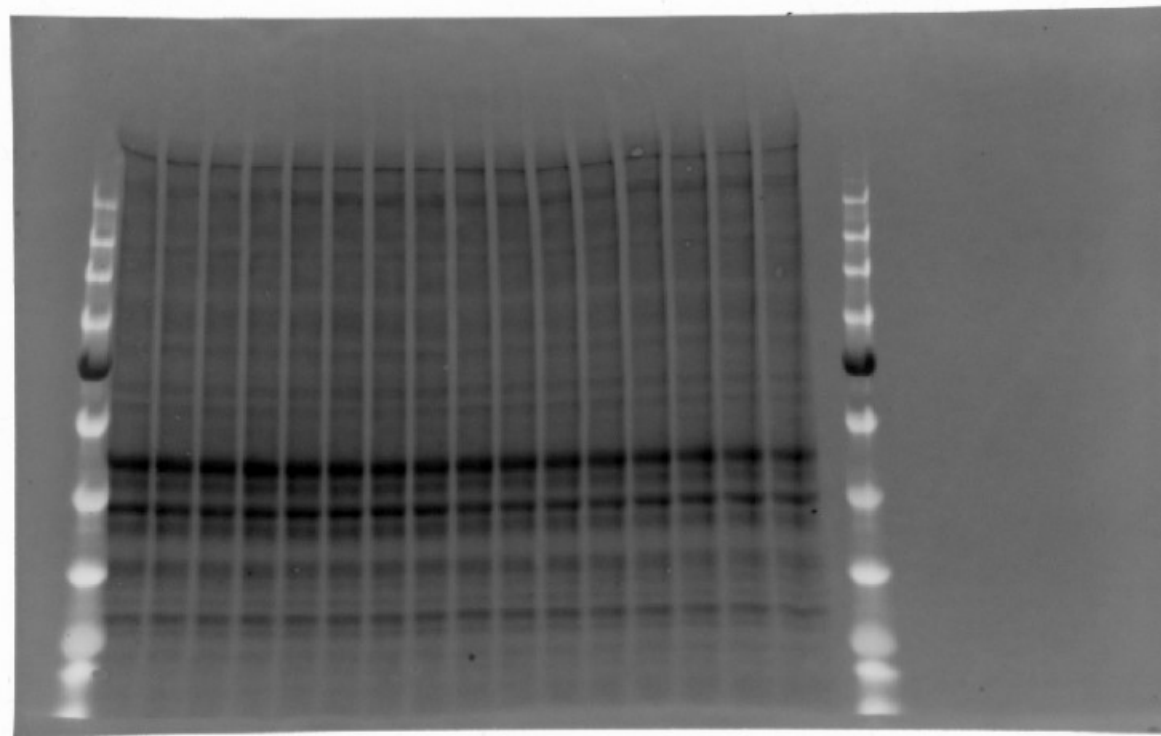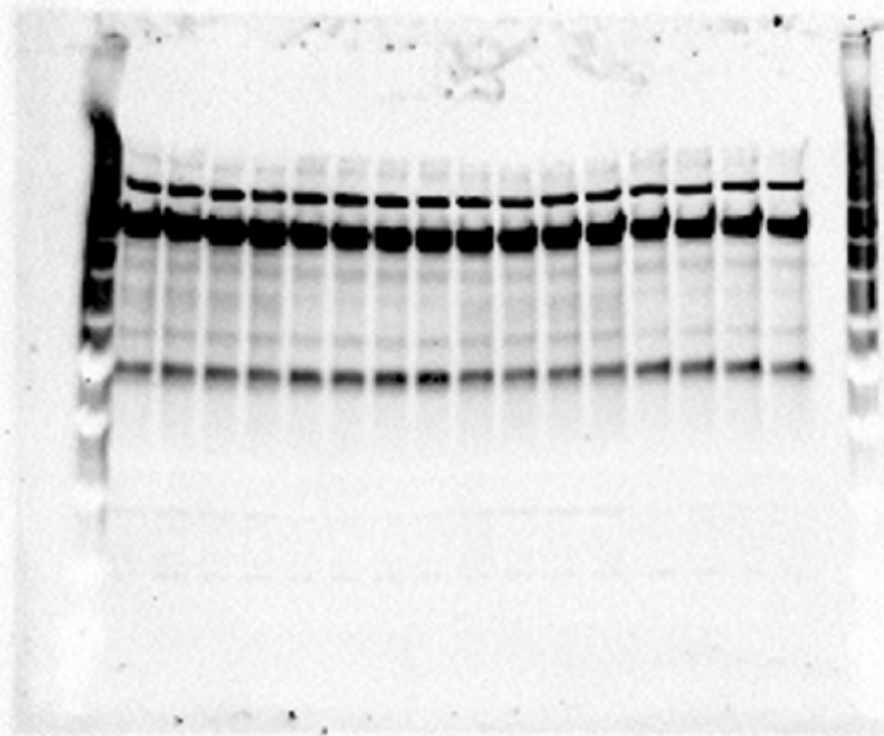

BNIP3 FEMALE-

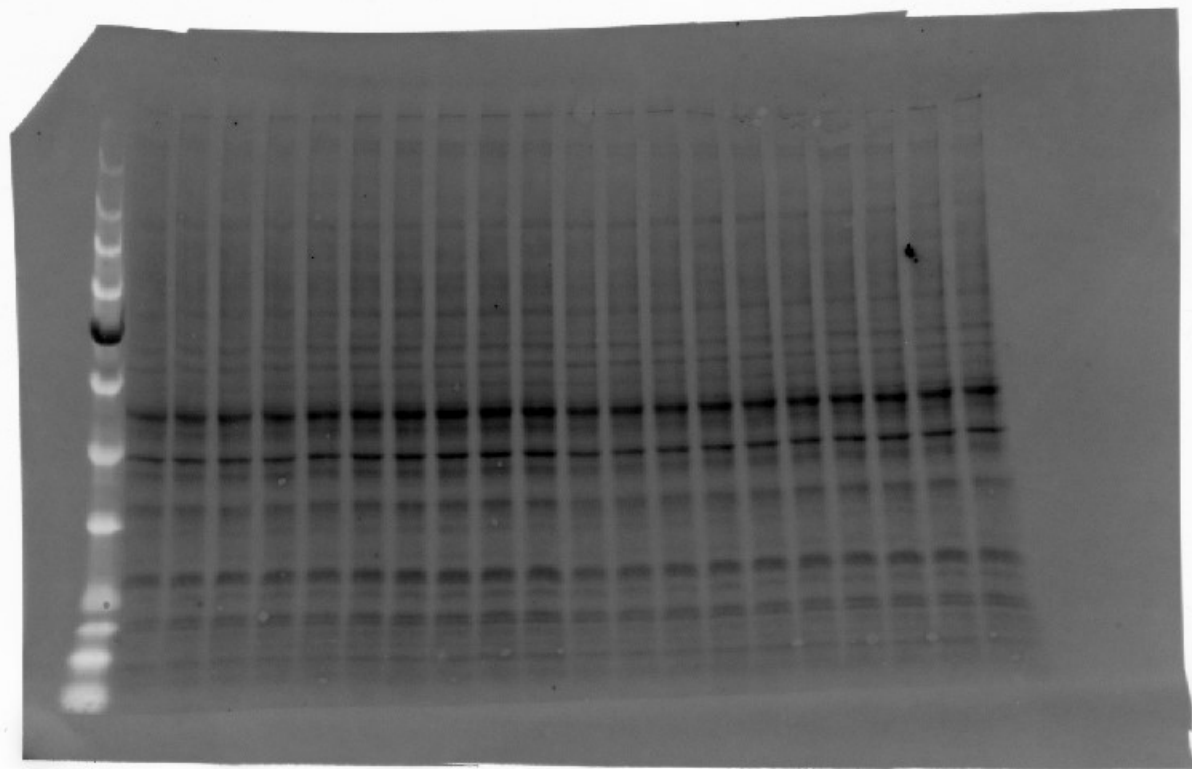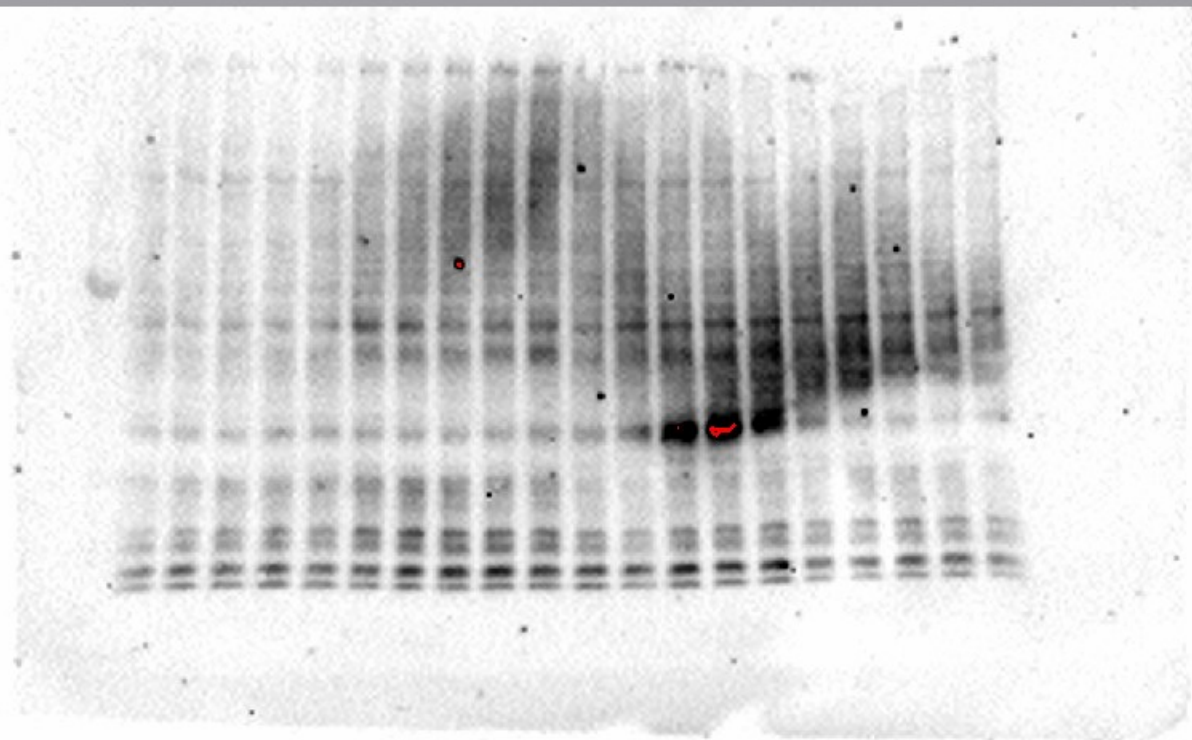

BNIP3 MALE-

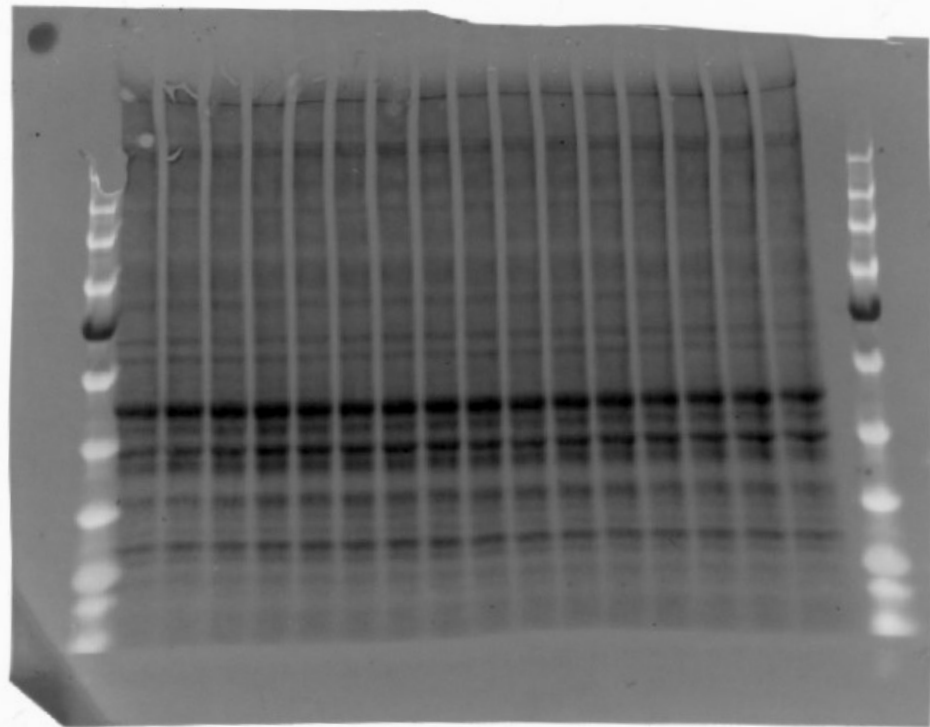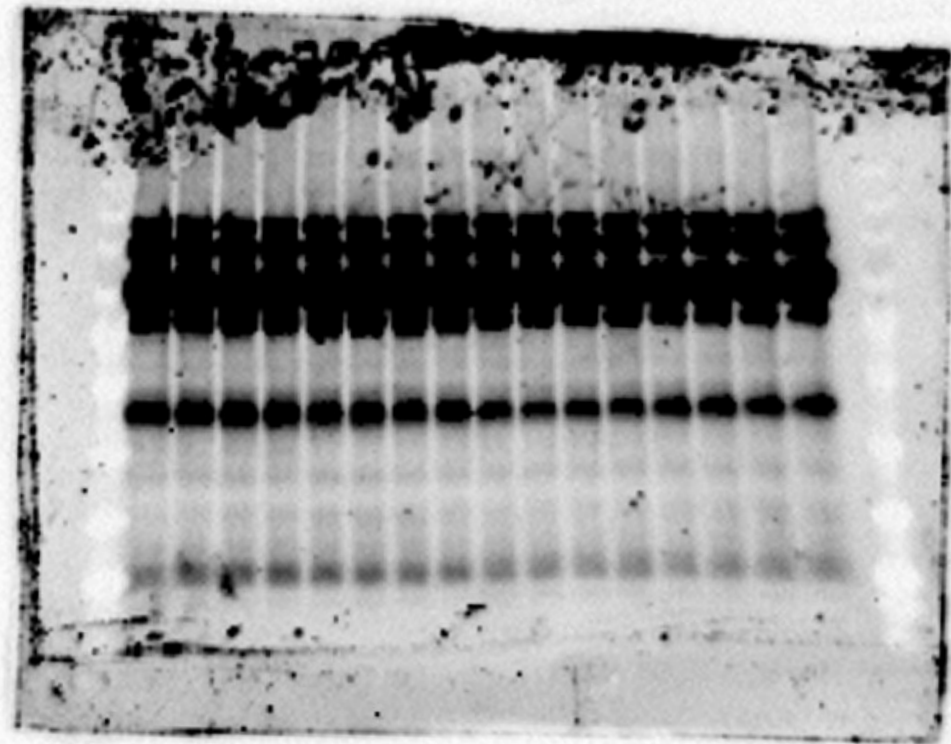

BNIP3L FEMALE-

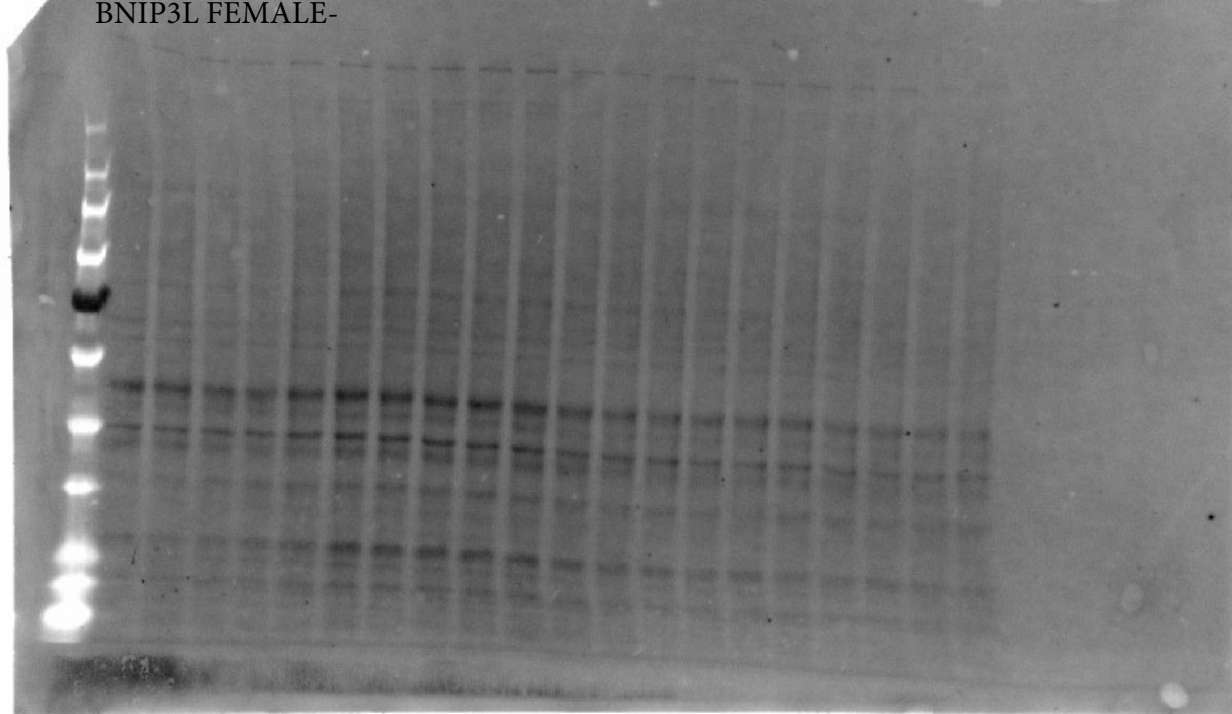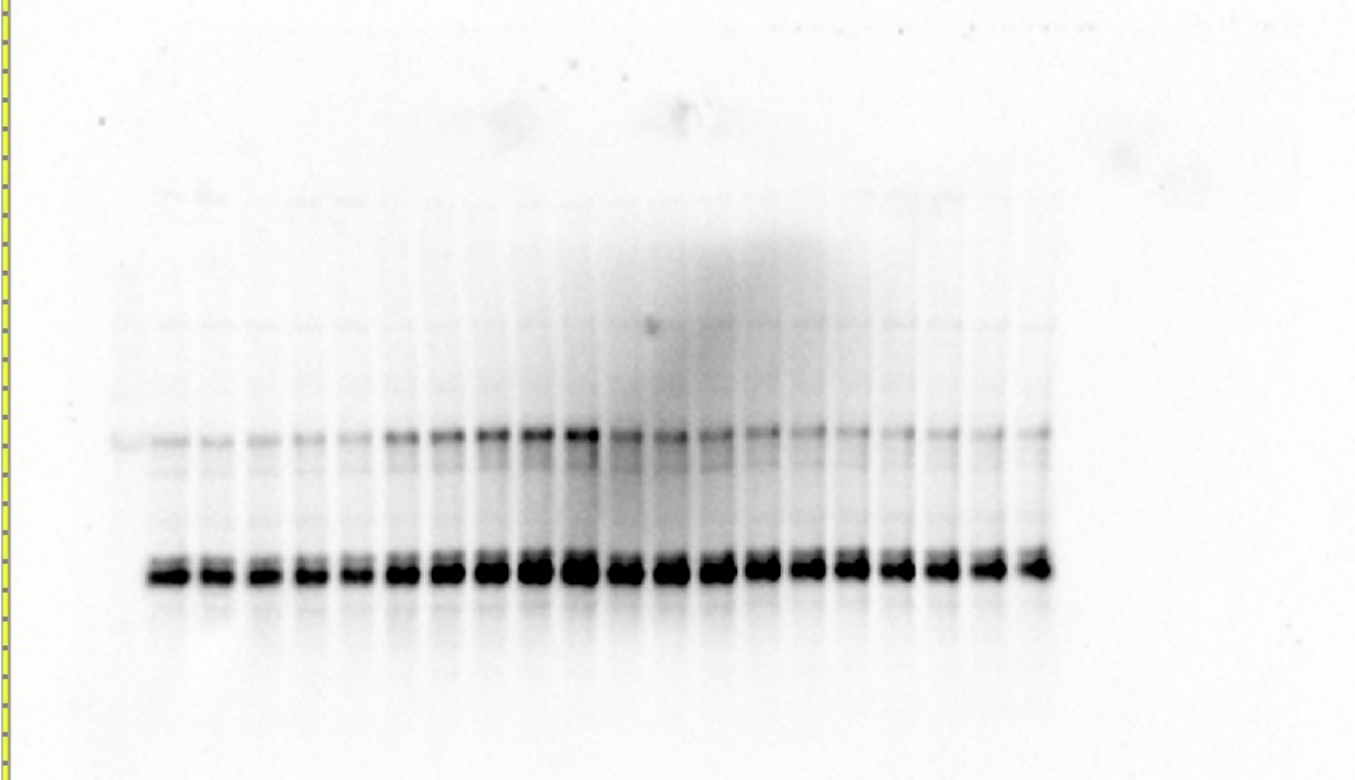



BNIP3L MALE-

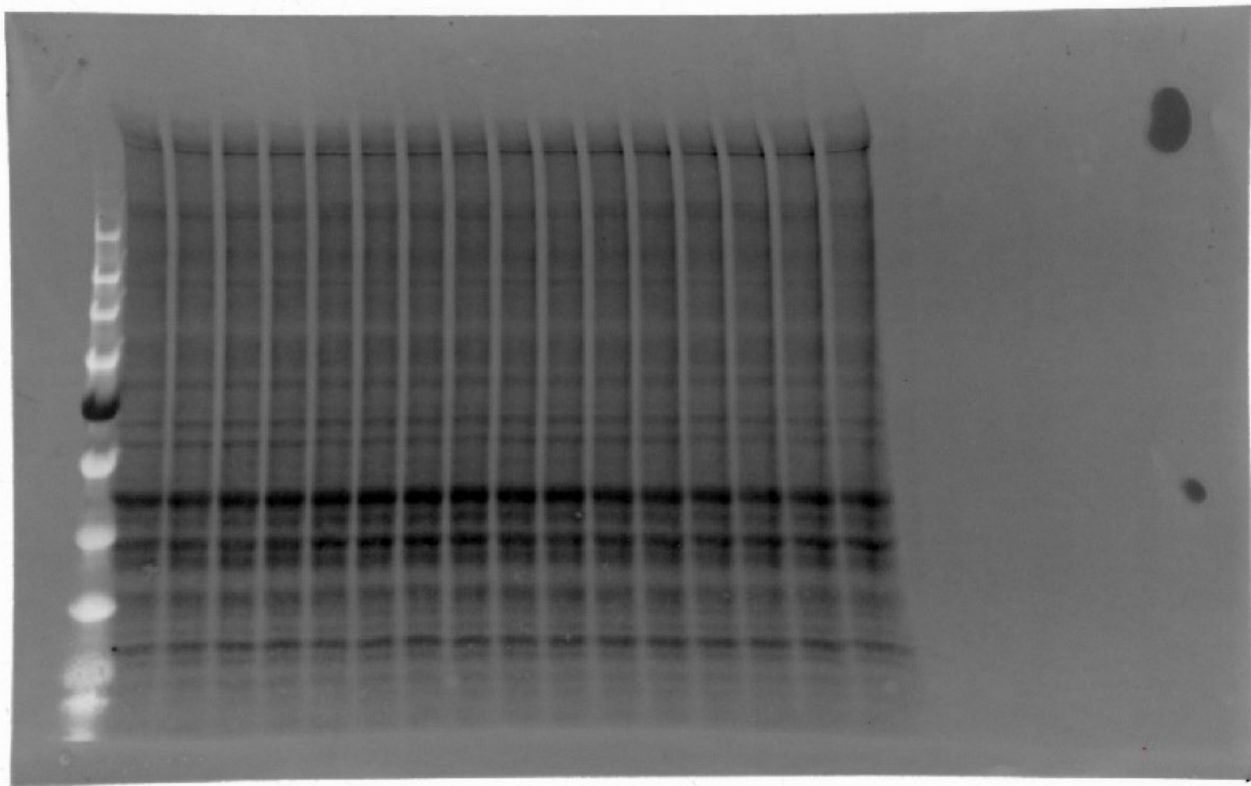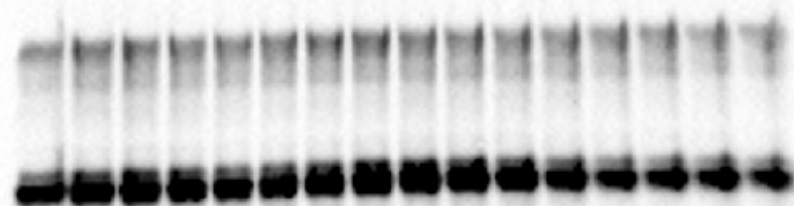

LC3 FEMALE-

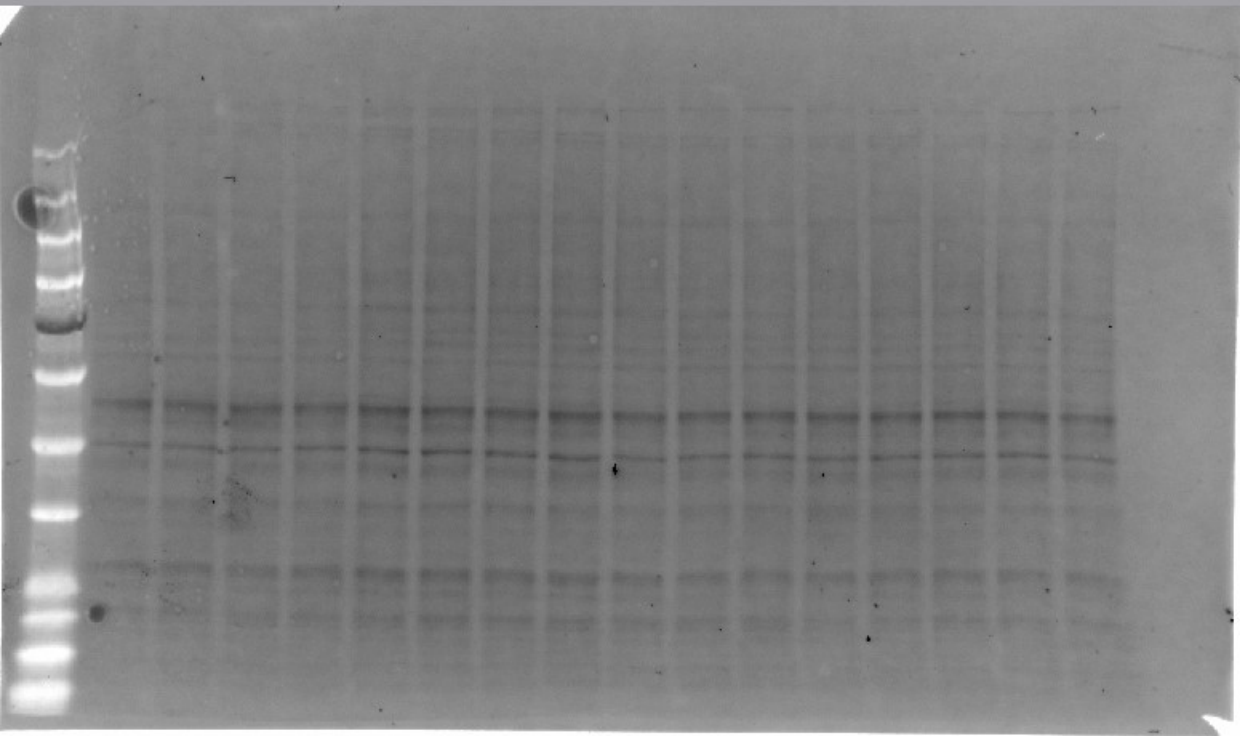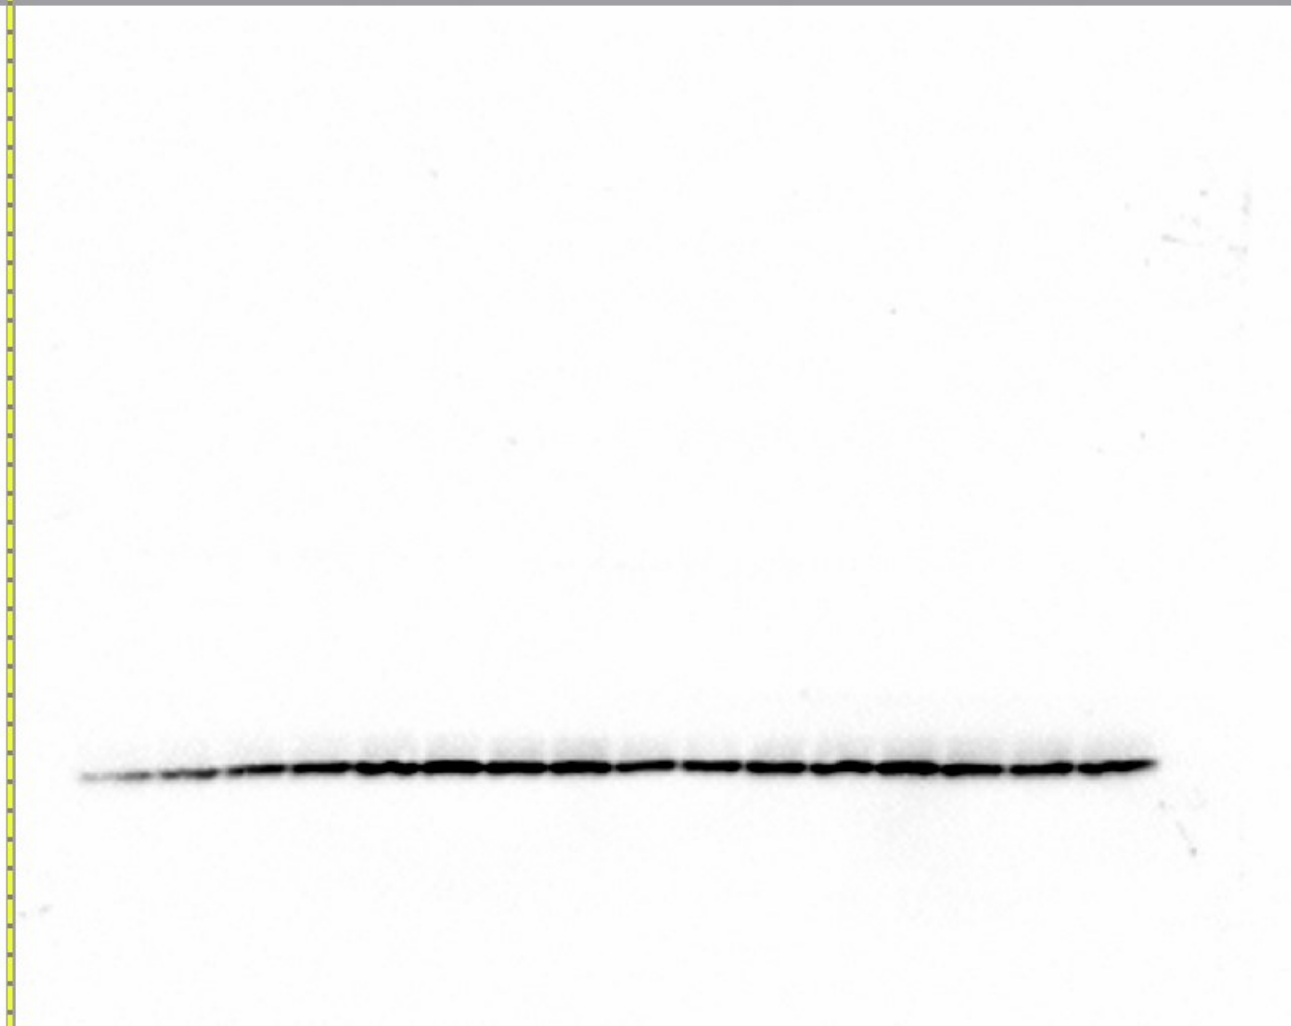



LC3 MALE-

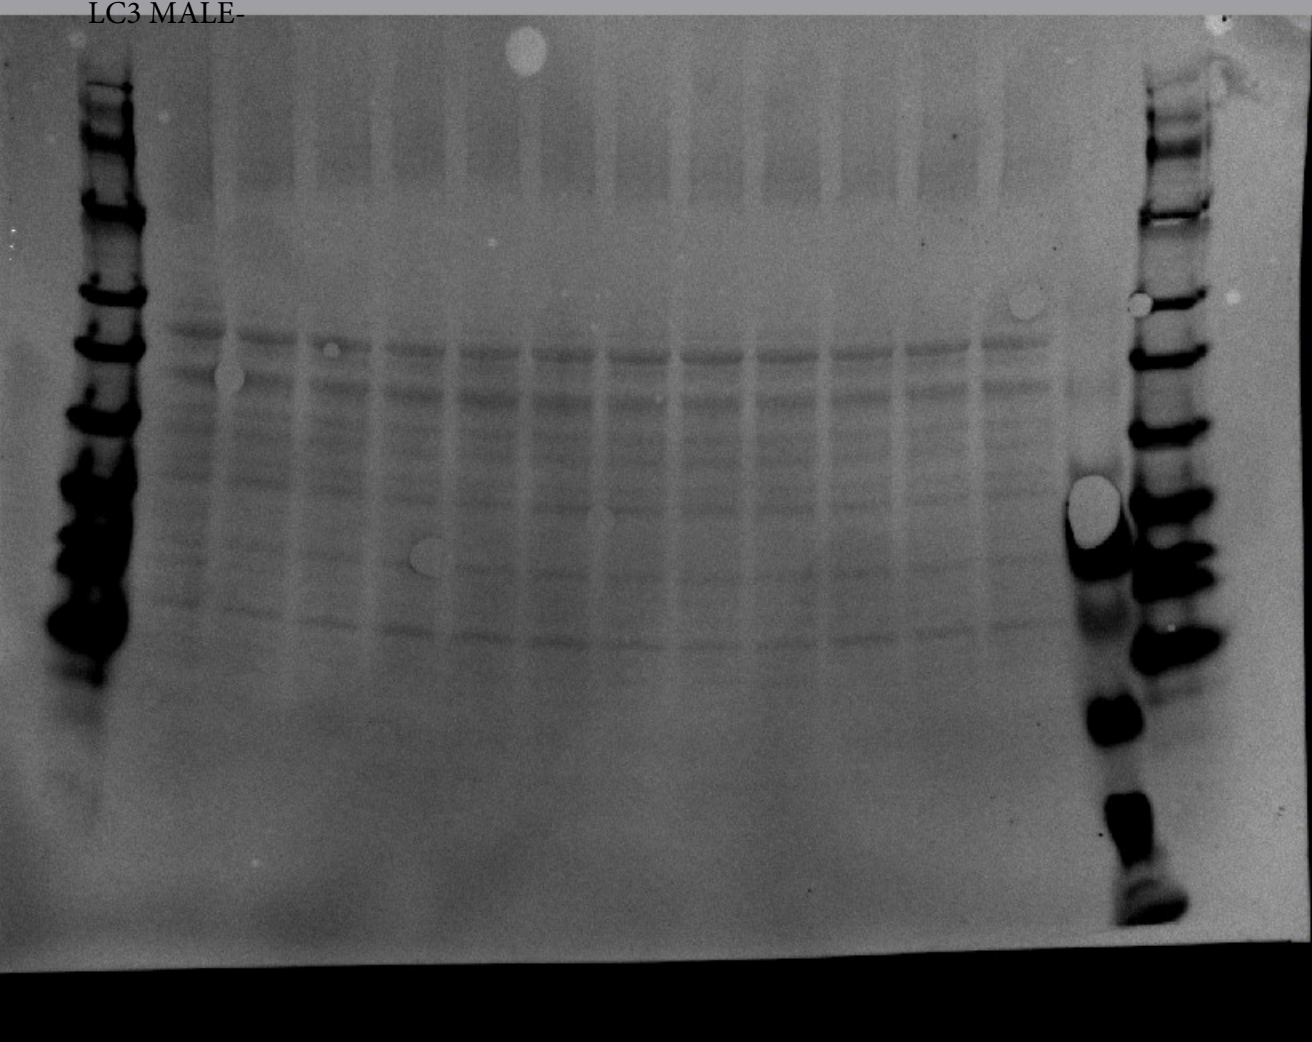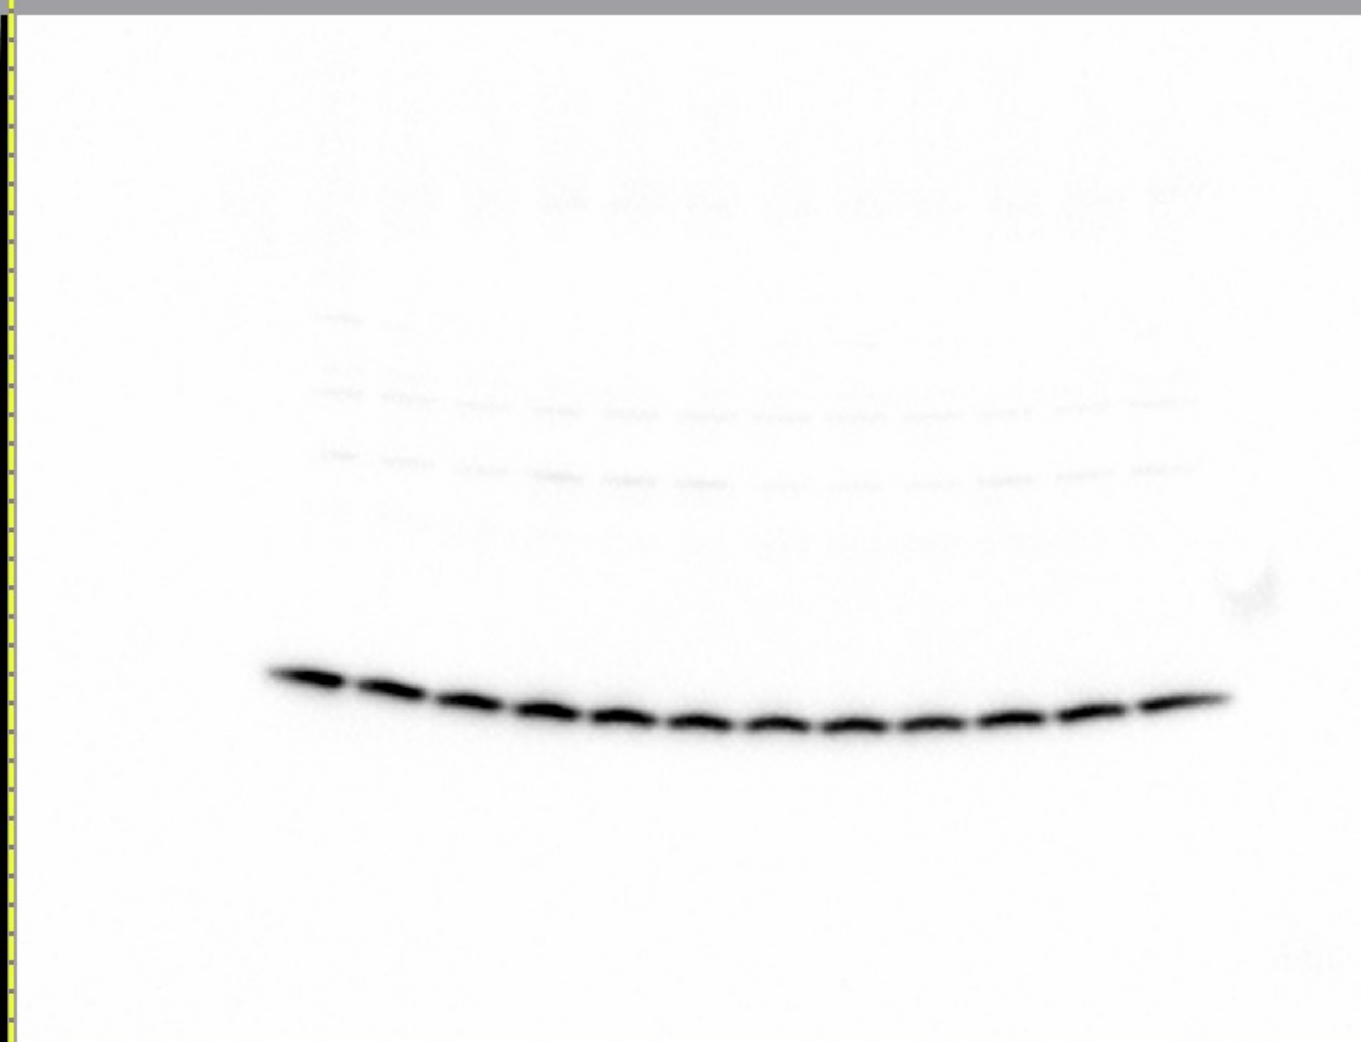

P62 FEMALE-

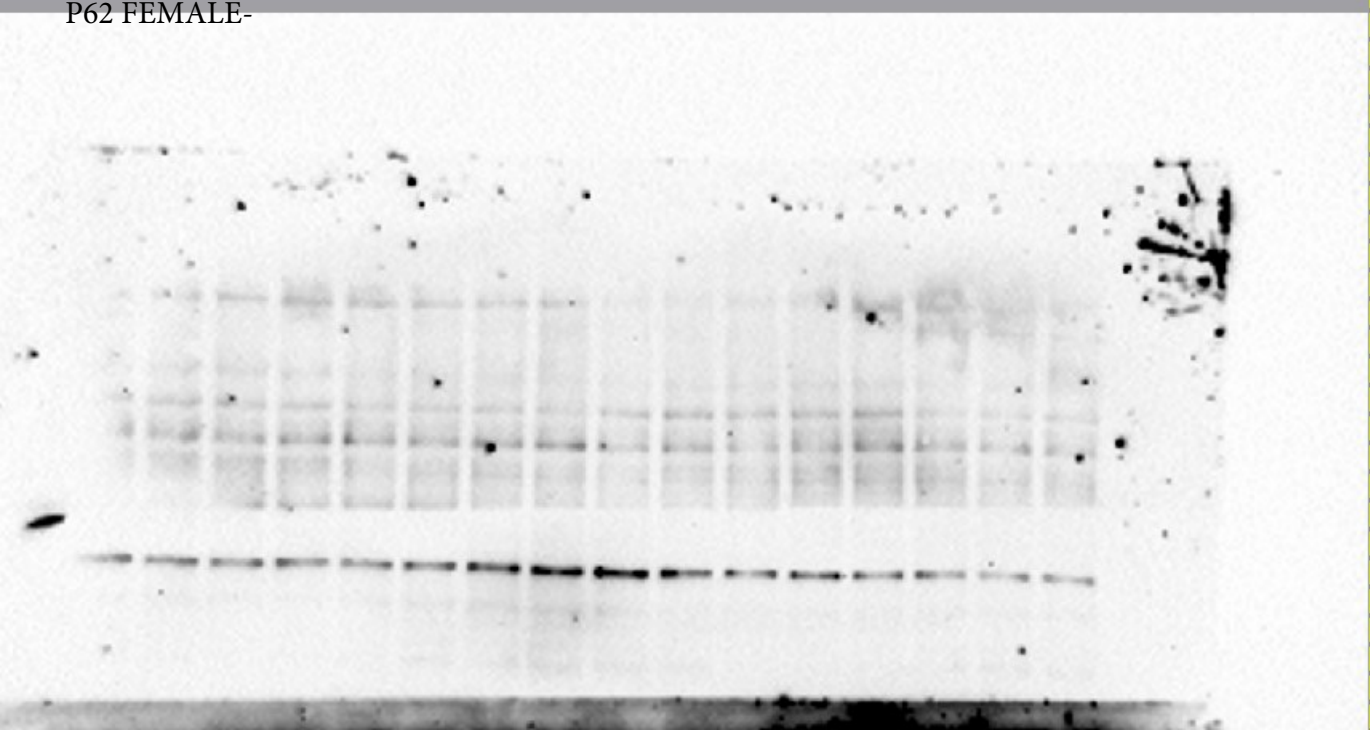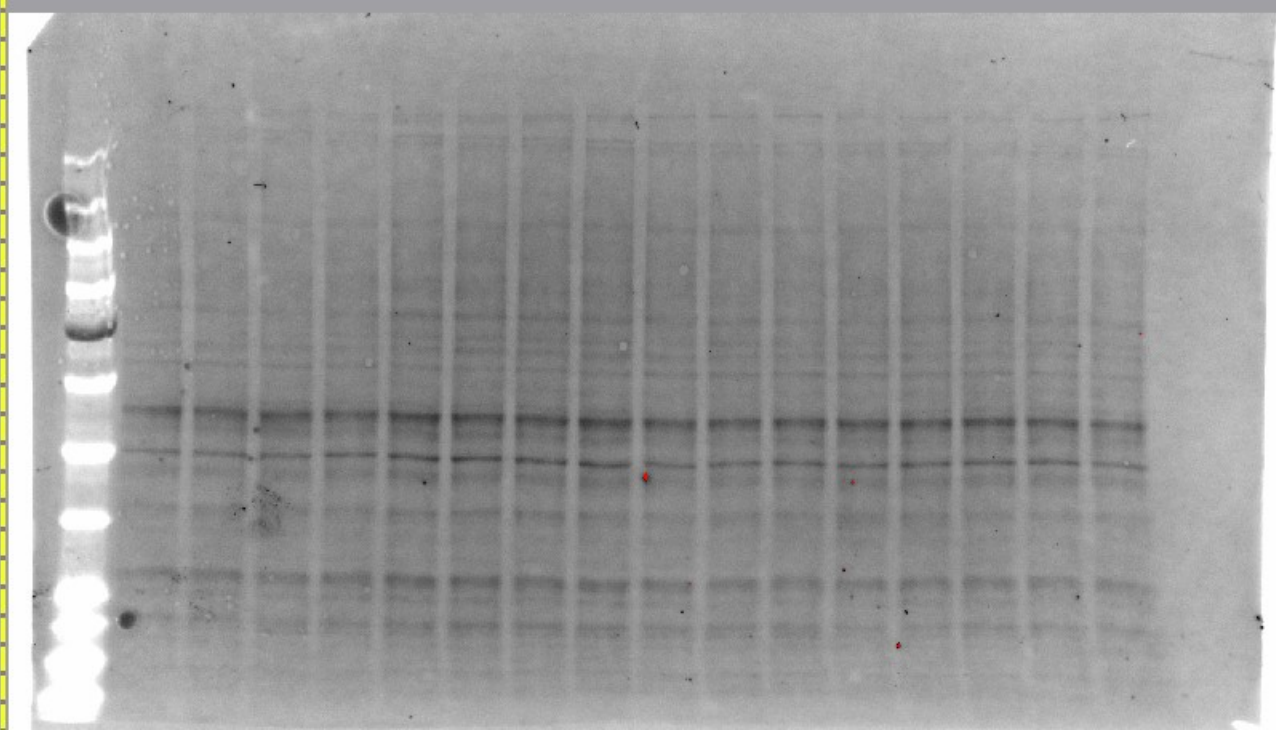

# P62 MALE TOTAL PROTEIN

p62 MALE-

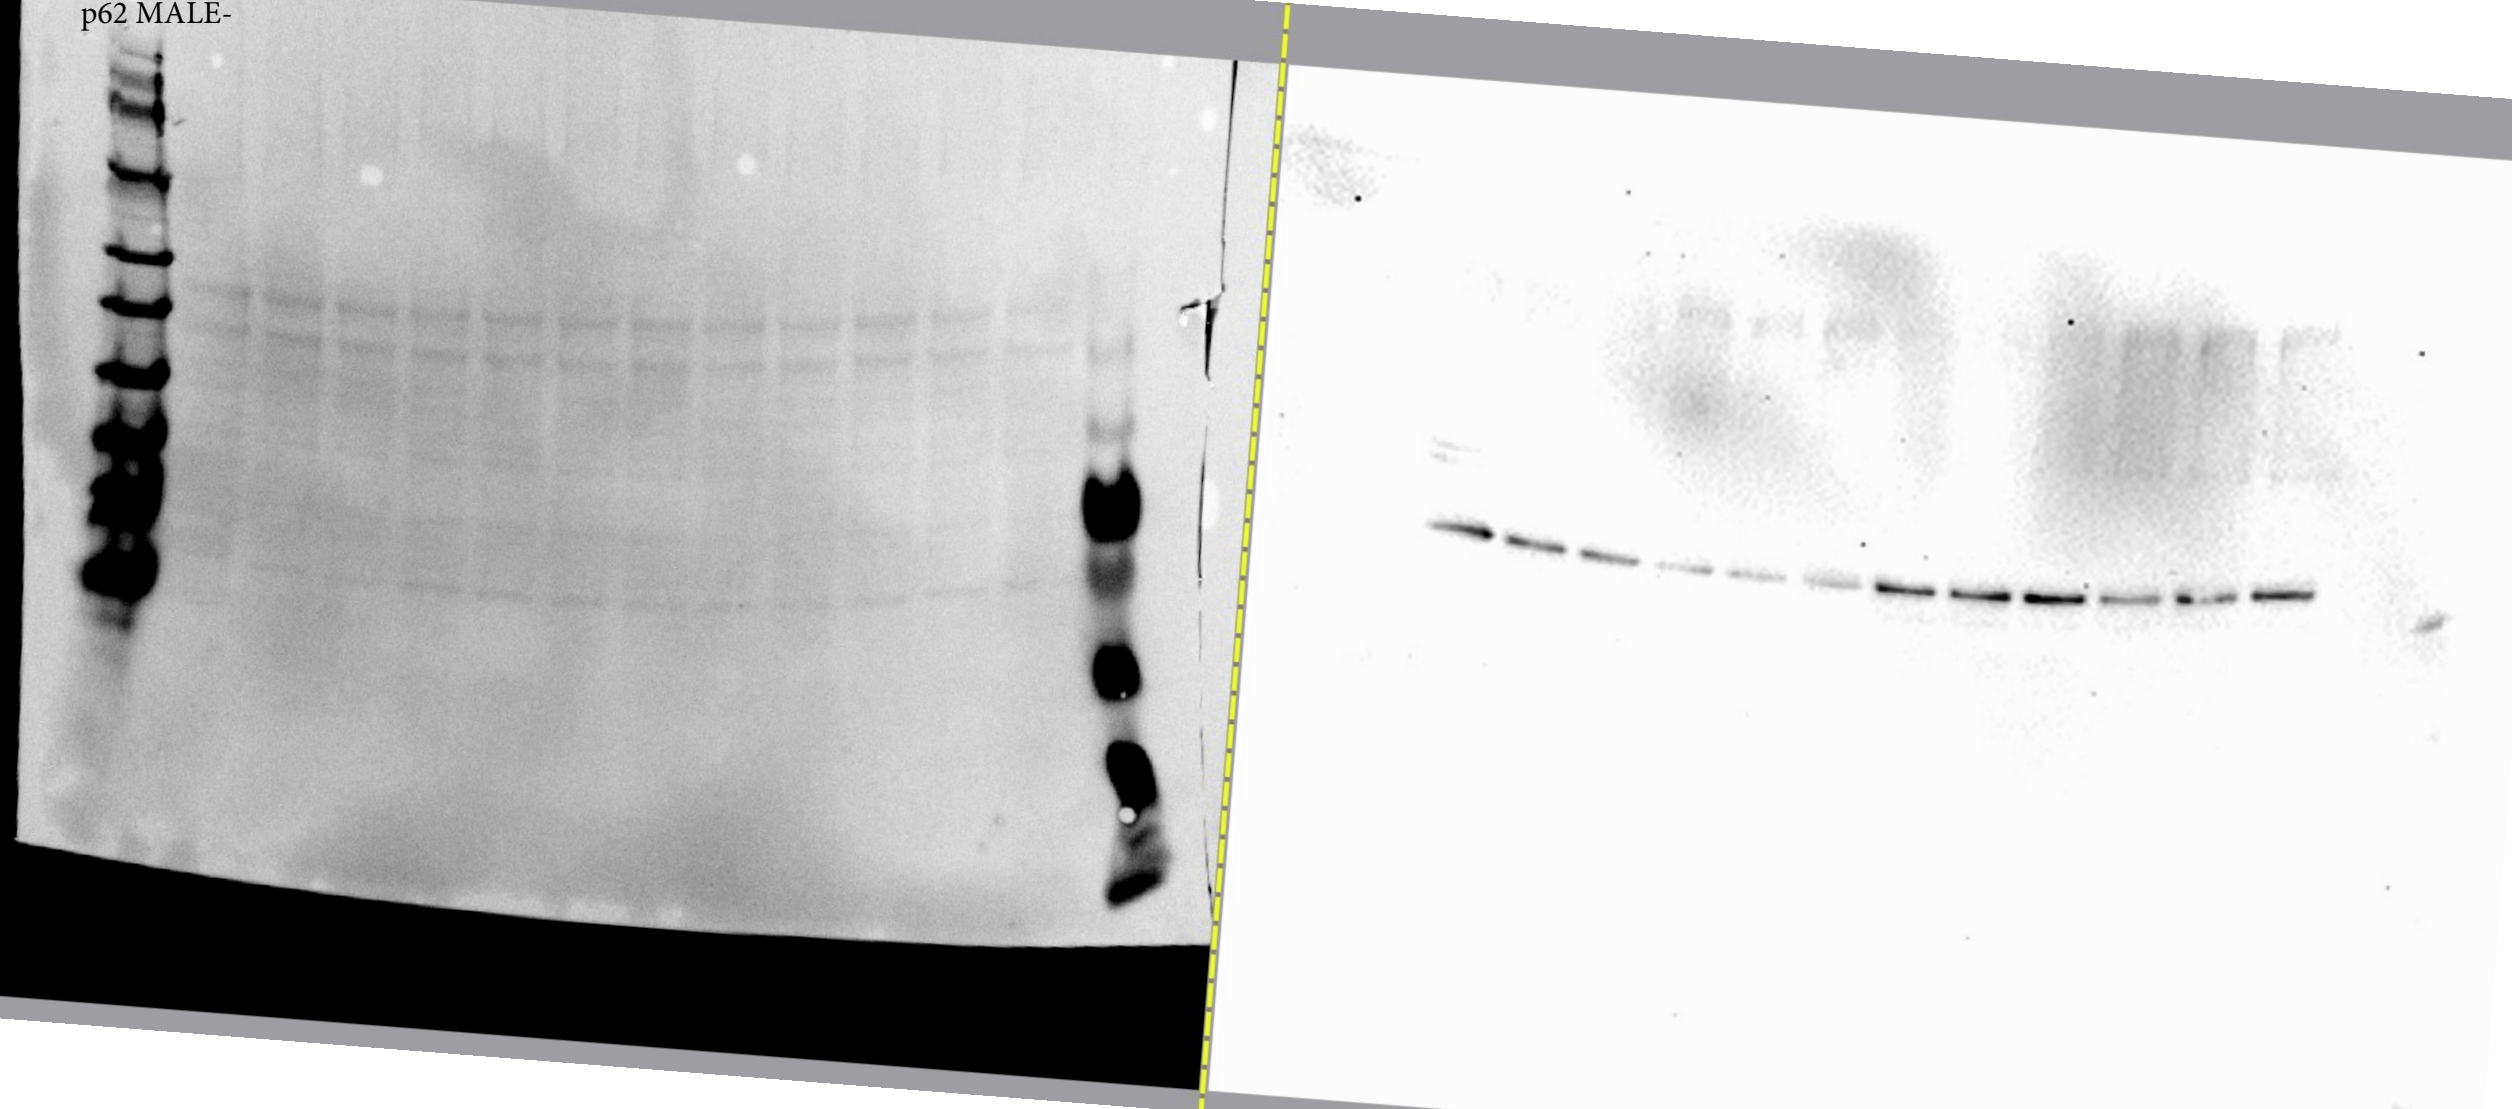

Supplement: MOESM11 [file 41420_2025_2490_MOESM11_ESM.pdf]
